# Supplementary material
Source: publisher figshare collection journal article supplement (https://acs.figshare.com/ndownloader/files/4202620)
Supplement: Supplementary file 1 [file 4202620]

Fig. S7

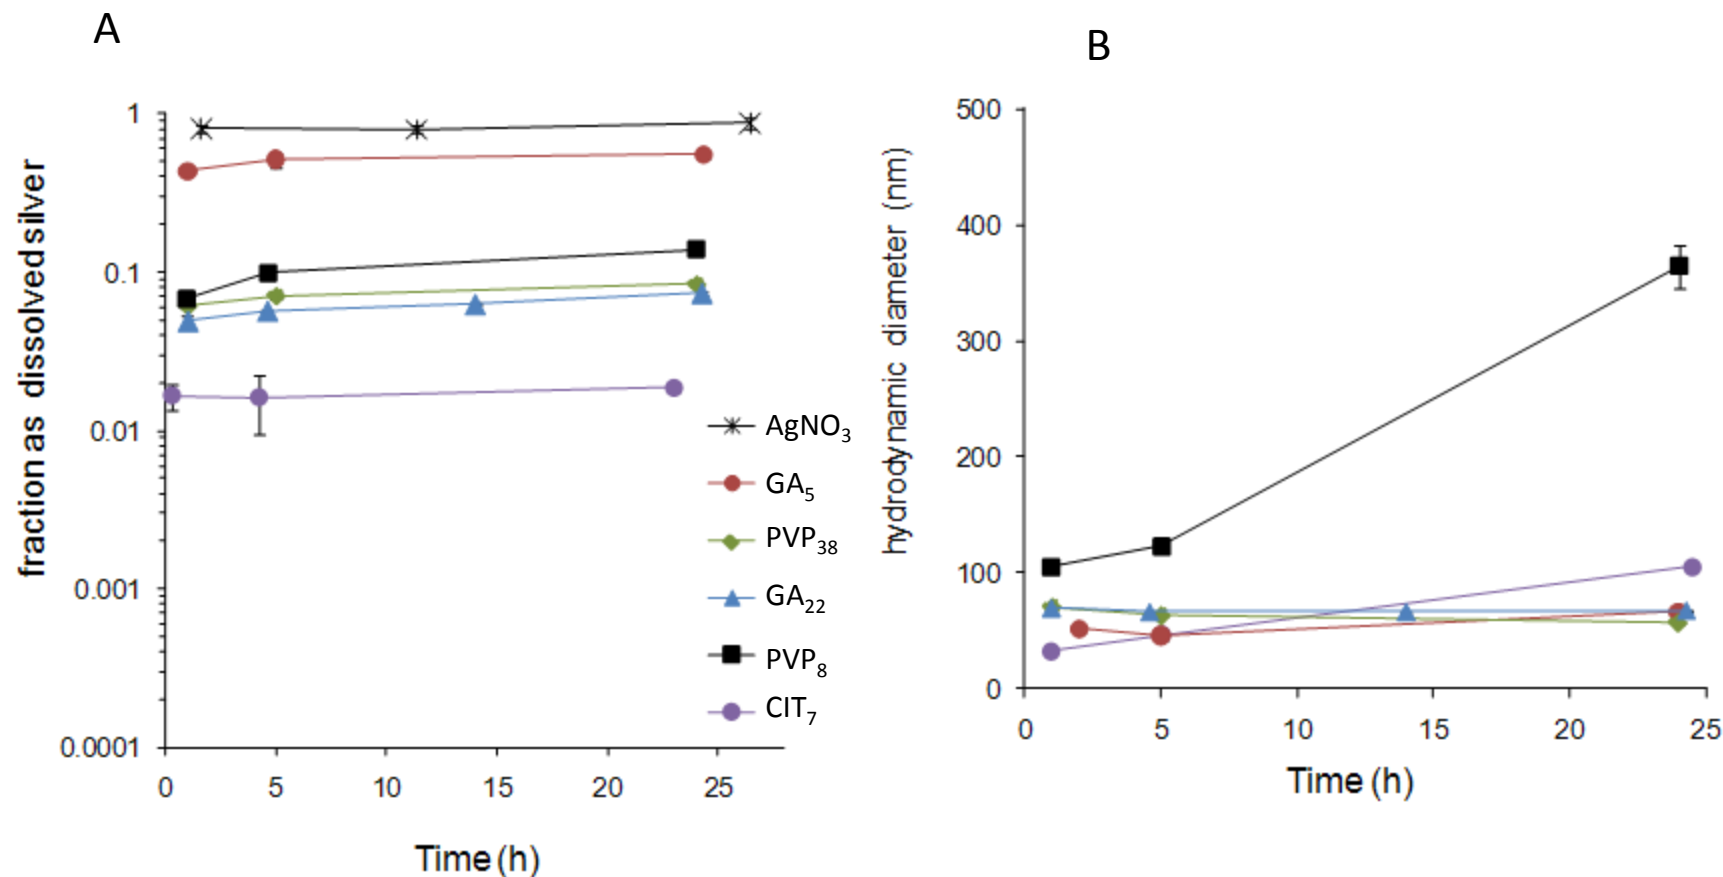

Supporting Information Figure S7: Effect of NAC on (A) Dissolved silver concentration; (B) Light intensity-weighted hydrodynamic diameter as quantified by dynamic light scattering. All suspensions consisted of 20 - 46  $\mu\text{M}$  silver in EPA water and 123  $\mu\text{M}$  NAC.
